# Supplementary material for: The Role of Left-Atrial Mechanics Assessed by Two-Dimensional Speckle-Tracking Echocardiography to Differentiate Hypertrophic Cardiomyopathy from Hypertensive Left-Ventricular Hypertrophy
Source: MDPI journal article supplement (doi:10.3390/diagnostics11050814), 2021-04-30
Supplement: s1 [file s1]

Supplementary Table S1 Left atrial parameters analysed and formulas

| Variable                                     | Abbreviation                  | Formula                                                                               |
|----------------------------------------------|-------------------------------|---------------------------------------------------------------------------------------|
| LA volumetric analysis and LA ejection force |                               |                                                                                       |
| <b>LA reservoir</b>                          |                               |                                                                                       |
| Left atrial total ejection volume            | LATEV (ml)                    | $LAV_{max} - LAV_{min}$                                                               |
| Left atrial total ejection fraction          | LATEF (%)                     | $LATEV / LAV_{max}$                                                                   |
| Left atrial ejection index                   | LAEI (%)                      | $LATEV / LAV_{min}$                                                                   |
| <b>LA conduit function</b>                   |                               |                                                                                       |
| Left atrial passive ejection volume          | LAPEV (ml)                    | $LAV_{max} - LAV_{pre-A}$                                                             |
| Left atrial passive ejection fraction        | LAPEF (%)                     | $LAPEV / LAV_{max}$                                                                   |
| <b>LA pump function</b>                      |                               |                                                                                       |
| Left atrial active ejection volume           | LAAEV (ml)                    | $LAV_{pre-A} - LAV_{min}$                                                             |
| Left atrial active ejection fraction         | LAAEF (%)                     | $LAAEV / LAV_{pre-A}$                                                                 |
| Left atrial ejection force                   | LAEF (kdyne)                  | $0.5 \times 1.06 \times \text{mitral annulus area} \times (\text{peak A velocity})^2$ |
| LA deformation analysis                      |                               |                                                                                       |
| <b>Reservoir function</b>                    |                               |                                                                                       |
| Left atrial strain during reservoir phase    | LASr (%)                      | $S_{\text{mitral valve opening}} - S_{\text{LVED}}$                                   |
| Peak strain rate during reservoir phase      | pLASRr ( $\text{sec}^{-1}$ )  | positive peak strain rate during reservoir phase                                      |
| Left atrial stiffness index                  | LASI                          | $E/e'm / LASr$                                                                        |
| <b>Conduit function</b>                      |                               |                                                                                       |
| Left atrial strain during conduit phase      | LAScd (%)                     | $S_{\text{LVED}} - S_{\text{atrial contraction}}$                                     |
| Peak strain rate during conduit phase        | pLASRcd ( $\text{sec}^{-1}$ ) | negative peak strain rate during conduit phase                                        |
| <b>Contractile function</b>                  |                               |                                                                                       |
| Left atrial strain during contractile phase  | LASct (%)                     | $S_{\text{atrial contraction}} - S_{\text{mitral valve opening}}$                     |
| Peak strain rate during contractile phase    | pLASRct ( $\text{sec}^{-1}$ ) | negative peak strain rate during contractile phase                                    |

A atrial velocity of mitral flow; e'm average of early diastolic velocity of lateral and mitral annulus; LAVmax left atrial volume during systole; LAVmin left atrial volume during diastole; LAVpre-A left atrial volume before P-wave; LVED left ventricle end-diastole.

Supplementary Table S2 Intra and inter-observer reliability for reservoir, conduit and contractile left atrial strain and strain rate

| Parameter                     | Intra-observer 1 |           | Intra-observer 2 |           | Inter-observer |           |
|-------------------------------|------------------|-----------|------------------|-----------|----------------|-----------|
|                               | ICC              | 95% CI    | ICC              | 95% CI    | ICC            | 95% CI    |
| <b>Reservoir function</b>     |                  |           |                  |           |                |           |
| LASr (%)                      | 0.9              | 0.8-0.96  | 0.92             | 0.8-0.99  | 0.84           | 0.7-0.94  |
| pLASRr ( $\text{sec}^{-1}$ )  | 0.82             | 0.71-0.93 | 0.86             | 0.9-0.99  | 0.92           | 0.8-0.96  |
| <b>Conduit function</b>       |                  |           |                  |           |                |           |
| LAScd (%)                     | 0.78             | 0.81-0.9  | 0.9              | 0.82-0.99 | 0.8            | 0.7-0.88  |
| pLASRcd ( $\text{sec}^{-1}$ ) | 0.82             | 0.7-0.89  | 0.89             | 0.8-0.93  | 0.9            | 0.82-0.96 |
| <b>Contractile function</b>   |                  |           |                  |           |                |           |
| LASct (%)                     | 0.79             | 0.7-0.88  | 0.94             | 0.9-0.99  | 0.86           | 0.8-0.9   |
| pLASRct ( $\text{sec}^{-1}$ ) | 0.86             | 0.8-0.92  | 0.89             | 0.8-0.92  | 0.71           | 0.7-0.9   |

CI confidence interval; ICC intraclass coefficient correlation; LASct left atrial strain during contractile phase; LASr left atrial strain during reservoir phase; pLASRr peak strain rate during reservoir phase; pLASRcd peak strain rate during conduit phase; pLASRct peak strain rate during contractile phase.

Supplementary Table S3 Association of two-dimensional echocardiography characteristics with LVH due to hypertrophic cardiomyopathy after adjustment for age and sex in all subjects with LVH (n=86)

| Variables                               | Univariate analysis |        | Multivariate analysis |       |
|-----------------------------------------|---------------------|--------|-----------------------|-------|
|                                         | Odds ratio (95% CI) | p      | Odds ratio (95% CI)   | p     |
| IVS (mm)                                | 1.39 (1.05-1.43)    | <0.001 | 1 (0.6-1.6)           | 0.051 |
| E/e's                                   | 1.27 (0.88-0.98)    | 0.03   | 0.5 (0.2-1.4)         | 0.07  |
| E/e'l                                   | 0.69 (0.42-0.86)    | 0.035  | 0.6 (0.1-1.4)         | 0.08  |
| LAV <sub>max</sub> (ml/m <sup>2</sup> ) | 1.02 (1.05-1.73)    | 0.001  | 0.8 (0.2-1)           | 0.9   |
| LASr (%)                                | 0.11 (0.9-1.3)      | 0.058  |                       |       |
| pLASRr (sec <sup>-1</sup> )             | 0.45 (0.5-0.97)     | 0.04   | 0.1 (0.1-0.9)         | 0.81  |
| LASr/IVS                                | 0.22 (0.91-1.06)    | 0.06   |                       |       |
| pLASRr/IVS                              | 0.98 (0.97-1.1)     | 0.05   |                       |       |
| LASI                                    | 0.3 (0.1-0.9)       | 0.04   | 0.2 (0.1-0.95)        | 0.45  |
| LAScd (%)                               | 0.99 (0.96-1.04)    | 0.06   |                       |       |
| pLASRcd (sec <sup>-1</sup> )            | 1.04 (1.01-1.31)    | 0.021  | 0.6 (1.3-2.1)         | 0.06  |
| LAScd/IVS                               | 1.8 (1.1-1.47)      | 0.02   | 0.5 (1.1-2.3)         | 0.05  |
| pLAScd/IVS                              | 1.1 (0.9-1.4)       | 0.09   |                       |       |
| LASct (%)                               | 1.2 (0.8-0.92)      | 0.01   | 1 (0.7-1.2)           | 0.05  |
| pLASRct (sec <sup>-1</sup> )            | 1.1 (0.7-0.99)      | 0.04   | 1.1 (0.6-1.3)         | 0.06  |
| LASct/IVS                               | 1.8 (0.86-0.97)     | <0.001 | 1.4 (0.7-0.9)         | 0.02  |
| pLASRct/IVS                             | 1.6 (0.8-0.99)      | 0.001  | 1.2 (0.7-0.98)        | 0.03  |

CI confidence interval; e'l early diastolic velocity of lateral annulus; e's early diastolic velocity of mitral annulus; IVS interventricular septum; LAScd left atrial strain during conduit phase; LASct left atrial strain during contractile phase; LASi left atrial stiffness index; LASr left atrial strain during reservoir phase; LAV<sub>max</sub> left atrial volume during systole; LVH left ventricular hypertrophy; pLASRcd peak strain rate during conduit phase; pLASct peak strain rate during contractile phase; pLASRr peak strain rate during reservoir phase.
